**Single cell transcriptomic analysis revealed long-lasting adverse effects of prenatal tamoxifen administration on neurogenesis in prenatal and adult brains**

Chia-Ming Lee<sup>1,\*</sup>, Liqiang Zhou<sup>2,\*</sup>, Jiping Liu<sup>2</sup>, Jiayu Shi<sup>2</sup>, Yanan Geng<sup>2</sup>, Jiaruo Wang<sup>1</sup>, Xinjie Su<sup>1</sup>, Nicholas Barad<sup>1</sup>, Junbang Wang<sup>2</sup>, Yi E. Sun<sup>1,2,†</sup>, and Quan Lin<sup>1,†</sup>

<sup>1</sup> Department of Psychiatry and Behavioral Sciences, Intellectual Development and Disabilities Research Center, University of California, Los Angeles, CA 90095

<sup>2</sup> Stem Cell Translational Research Center, Tongji Hospital, Tongji University School of Medicine, Shanghai, China 200092

\* Equal contribution

† To whom correspondence may be addressed. Q.L. [qlin@mednet.ucla.edu](mailto:qlin@mednet.ucla.edu), Y.E.S. [ysun@mednet.ucla.edu](mailto:ysun@mednet.ucla.edu)

## Summary

CreER/LoxP system has enabled precise gene manipulation in distinct cell subpopulations at any specific time point upon tamoxifen (TAM) administration. This system is widely accepted to track neural lineages and study gene functions. We have observed prenatal TAM treatment caused high rate of delayed delivery and mortality of pups. These substances could promote undesired results, leading to data misinterpretation. Here, we report that TAM administration during early stages of cortical neurogenesis promoted precocious neural differentiation, while inhibited neural progenitor cell (NPC) proliferation. The TAM-induced inhibition of NPC proliferation led to deficits in cortical neurogenesis, dendritic morphogenesis, and cortical patterning in neonatal and postnatal offspring. Mechanistically, single cell RNA sequencing (scRNA-seq) analysis combined with *in vivo* and *in vitro* assays showed TAM could exert these drastic effects mainly through dysregulating the expression of *Dmrta2* and *Wnt8b*. In adult mice, administration of TAM significantly attenuated NPC proliferation in both the subventricular zone and the dentate gyrus. This study revealed the cellular and molecular mechanisms for the adverse effects of prenatal tamoxifen administration on corticogenesis, suggesting that tamoxifen-induced CreER-LoxP system may not be suitable for neural lineage tracing and genetic manipulation studies in both embryonic and adult brains.

## Introduction

Tamoxifen (TAM)-inducible CreER/LoxP system is one of the most widely used genetic tools that have enabled precise gene manipulation in distinct cell subpopulations at any specific time point which is known as temporally and spatially controllable gene expression. Besides gene knockout, CreER/LoxP technology has enabled labeling of any cell types for genetic fate-mapping study (Bond et al., 2015; Kretzschmar and Watt, 2012; Metzger et al., 1995; Visel et al., 2013).

TAM, a selective estrogen receptor modulator (SERM), is considered a pioneering and commonly used drug to treat estrogen receptor positive breast cancer (Cuzick et al., 2015). In humans, a study based on AstraZeneca Safety Database suggested that TAM therapy of breast cancer during pregnancy is tightly associated with spontaneous abortions, fetal defects, and congenital malformations (Braems et al., 2011). To avoid significant birth defects, TAM administration needs to be discontinued during pregnancy in breast cancer patients (Barthelmes and Gateley, 2004; Jyoti et al., 2016; Koca et al., 2013). In rodents, adverse effects of TAM on prenatal and postnatal mice have been reported by a considerable number of studies. Empirically, administration of TAM or its active metabolite, 4-hydroxytamoxifen (4-OH-TAM) by either gavage (~1.5-10mg TAM/mouse) or intraperitoneal (IP) injections (~750µg-1.5mg TAM/mouse) to pregnant mice led to embryonic lethality and/or dystocia. To obtain postnatal offspring, it is frequently required that a caesarian section is performed followed by fostering (Berg et al., 2019; Gao et al., 2014; Georgala et al., 2011; Imayoshi et al., 2010; Lizen et al., 2015; Paul S. Danielian, 1998).

Our initial study showed that administration of TAM to pregnant mice at E10 greatly reduced the size of the cerebral hemispheres and the olfactory bulbs, enlarged the lateral ventricle, and thinned the cortical plate (Fig. 1A), suggesting prenatal TAM exposure has a drastic impact on cortical neurogenesis. We delivered TAM to more than 70 litters of three different mouse lines by IP injection (i.e. C57BL/6, 129S6/C57BL/6, & CD1). TAM dosages tested per pregnant dam in this study were 500 $\mu$ g (5 litters), 750 $\mu$ g ( $\geq$ 50 litters), 1mg (5 litters), and 2mg ( $\geq$ 10 litters). The delayed delivery and/or mortality of pups were always observed in litters with TAM dosage of 750 $\mu$ g/animal and above.

To reveal the adverse effects of TAM on cortical neurogenesis, we carried out scRNA-seq analysis. Combined with in situ hybridization (ISH) and immunostaining assays, we report the biphasic effects of TAM treatment during cortical neurogenesis. On the one hand, TAM promoted precocious cortical neurogenesis. On the other hand, it blocked NPC proliferation and thus ultimately resulted in impairment of cortical neurogenesis in postnatal offspring. Mechanistically, TAM could exert these drastic effects through downregulating the expression of *Dmrta2* and its effector *Hes1*, which have been shown to play critical roles in NPC fate maintenance and neural differentiation (Young et al., 2017; Yuki Nakamura, 2000). Moreover, in TAM treated brains, misexpression of *Wnt8b* in the cortical hem and downregulation of Wnt and Bmp receptors, *Lrp6* and *Acvr2b*, respectively in the cortex may cause cortical patterning defects. In addition, we showed that TAM administration at E8.5 severely impaired neural dendritic morphogenesis and blocked gliogenesis in postnatal offspring. In adult mice, TAM treatment dramatically attenuated neural stem cell proliferation in the subventricular zone (SVZ) and the dentate gyrus (DG), the two areas where adult neurogenesis occurs.

## Results

**Prenatal TAM administration impaired neurogenesis and cortical organization in perinatal offspring.** It has been shown that the highest dose tolerance for a single prenatal (E7.5-10.5) TAM IP injection without significant lethality at term is about 1mg (~30-60 $\mu$ g TAM per gram body weight) (Hayashi and McMahon, 2002; Paul S. Danielian, 1998). Our preliminary study showed administration of 500 $\mu$ g TAM to prominin 1 promoter drove CreER reporter mice (Prom1CreER/floxed ZsGreen) at E8.5 and E10 did not elicit detectable green fluorescent protein signal at E18. Therefore, to study the effects of TAM on prenatal cortical development, we chose to administrate 750 $\mu$ g of TAM per pregnant dam (~25-30 $\mu$ g TAM per gram body weight).

Administration of TAM to pregnant mice at E10 reduced the size of the cerebral hemispheres at E18, the time when cortical neurogenesis is largely completed (Miller and Gauthier, 2007) (Fig. 1A). We found administration of TAM at E10 dysregulated the expression of multiple cortical patterning genes in the motor cortex (*Cyp26b1*, *Epha7*), the somatosensory cortex (*Mdga1*), and the visual cortex (*Crym*, *Epha7*) in E18 offspring (Fig. 1B). TAM treatment somewhat reduced visual cortex marker gene expression, and also expanded the somatosensory gene *Mdga1* expression posteriorly, implying cortical patterning deficits in TAM treated

offspring. To reveal the effects of TAM on corticogenesis thoroughly, we carried out scRNA-seq analysis.

TAM was IP injected to the pregnant dam at early stage of cortical neurogenesis (E10). At E12, the left and the right hemispheres were pooled and subjected to droplet-based scRNA-seq analysis (10X Genomics) (Fig. 1C). We applied quality filter and integrated analysis to merge control (CTL) and TAM datasets with total of 8,276 cells and 17,071 genes using the Seurat package (Butler et al., 2018; Satija et al., 2015). Based on uniform manifold approximation and projection (UMAP) analysis, we segregated the cells into 14 clusters (Fig. 1C). According to genes expression enrichment, we annotated the 14 clusters using major cell type of each cluster. There are neural progenitor cells (NPC1, *Pax6* and NPC2, *Olig2*), inhibitory neurons (Inh1, *Dlx1* and Inh2, *Gad2*), neuroblasts (NB, *Neurog2*), excitatory neurons (Ex, *Neurod6*), Caja-Retzius cells (CR, *Reln*), Cck+ neurons (*Cck*), cortical hem neurons (CH, *Rspo1*), neural crest cells (NC, *Crabp1*), red blood cells (RBC, *Alas2*), endothelial cells (EC, *Flt1*), microglia (MG, *Ctss*), and pericytes (PC, *Vtn*) (Fig. 1C, D). The scRNA-seq data showed that prenatal TAM exposure greatly reduced total numbers of pallial and subpallial NPCs (NPC1&2, dark grey & blue color) by 15.62%, while caused a total of 16.7% increase in both cortical and subcortical neurons (i.e. Inh1&2 (green color), Ex (pink color), CR (dark yellow color), and Cck+ neurons (orange color)) (Fig. 1E). Prenatal TAM treatment also reduced the number of cells in one of the major brain patterning centers, the cortical hem (light blue color) (O'Leary et al., 2007). We further analyzed ratios of progenitor and postmitotic cell clusters using cell fate markers, *Pax6*, *Eomes*, *Reln*, *Tbr1*, *Mef2c*, and *Rbfox3*, as well as cell cycle related genes, *Mki67* and *Cdkn1c*. TAM notably reduced number of progenitors in the pallial VZ (*Pax6*+), but increased the number of SVZ cells (*Eomes*+) and postmitotic neurons (*Rbfox3*+), including superficial layer (*Reln*+, *Mef2c*+) and deep layer (*Tbr1*+) neurons. In TAM treated brains, the number of proliferating cells (*Mki67*+) was dramatically reduced, and there were more cells expressing the cell cycle G1-phase marker, *Cdkn1c*+ (Fig. 1F).

In summary, our scRNA-seq analysis suggests that prenatal TAM exposure inhibits VZ progenitor (*Pax6*+) proliferation, while increasing the number of SVZ progenitor cells and promoting precocious neuronal differentiation. To investigate the biphasic effects of TAM, we sought to study the influences of prenatal TAM administration on cortical neurogenesis at different neurogenic stages and analyze its long-lasting effects in postnatal offspring.

**Prenatal TAM exposure inhibited VZ progenitor proliferation.** To validate the initial scRNA-seq analysis, we first measured the total number of NPCs in the cortex using the VZ and the SVZ markers, *Pax6* and *Eomes*, respectively. The ISH and immunostaining assays showed that in E10 TAM treated brains (750 $\mu$ g TAM/pregnant dam), the number of *Pax6*+ NPCs in the VZ was significantly reduced while *Eomes*+ NPCs in the SVZ was slightly increased (Fig. 2A, B, Sup. Fig. 1A). Second, bromodeoxyuridine (BrdU) labeling combined with *Mki67* immunostaining showed that TAM exposure at E10 and E13 greatly reduced the number of cells in the cell cycle (*Mki67*+) and in the S-phase (BrdU+) (Fig. 2C, Sup. Fig. 1B). Third, we measured cell cycle S-phase length using a 5-ethynyl-2'-deoxyuridine (EdU)/BrdU double labeling paradigm (Martynoga et al., 2005) (Fig. 2D). Cells that

left the S-phase during the labeling period (2hr) were labeled with EdU only (green color). Cells in S-phase were all BrdU labeled (red color). The EdU/BrdU double labeling assay showed a prolonged S-phase in TAM-treated, proliferating neural progenitors (Fig. 2D). Fourth, we assessed the number of dividing cells (M-phase) in the cortex using phospho-Histone H3 (pH3) antibody (Hendzel et al., 1997). We found there were more basal pH3+ cells in TAM treated brains than the controls, which may cause transient increase of Eomes+ cells. Contrary to its effect on basal dividing cells, TAM treatment reduced the number of pH3-labeled, apical dividing cells in the cortex (Fig. 2E), which may cause reduction of Pax6+ NPCs and lead to neurogenesis impairment later in life (Fig.1A). Finally, we found TAM treatment at early and mid-stage of cortical development quickly increased the number of cyclin dependent kinase inhibitor 1C (*Cdkn1c*) positive cells (Fig. 2F, Sup. Fig. 1C). The cell cycle arrest molecule, *Cdkn1c* (P57Kip2) is a strong inhibitor of several G1 cyclin/Cdk (Cyclin-dependent kinases) complexes and a negative regulator of cell proliferation (Shin-ichi Ohnuma, 2003; Tury et al., 2011). Increased number of cells in the G1-phase suggests an early cell cycle withdraw and subsequent advanced cortical neuronal differentiation. Taken together, it appears that in cortical NPCs, TAM administration disrupts cell cycle progression which in turn inhibits NPC proliferation. In the meantime, TAM promotes transient SVZ progenitor proliferation followed by early cell cycle withdraw, which leads to precocious neural differentiation.

To rule out the possibility that reduced number of NPCs is due to TAM-induced apoptosis, we carried out terminal deoxynucleotidyl transferase dUTP Nick-End Labeling (TUNEL) assay. We did not detect increased apoptosis in E12 brains when TAM (2mg/animal) was administrated at E10 (Sup. Fig. 1D).

**Prenatal TAM exposure promoted precocious and transient neural differentiation.** The scRNA-seq analysis showed an increased number of cells expressing postmitotic neuronal markers, such as *Reln*, *Rbfox3*, *Tbr1*, and *Mef2c* at E12 when TAM was administrated at E10 (Fig. 1F). There was an increased number of cells expressing cell cycle G1-phase gene *Cdkn1c* in TAM treated brains which further suggested a precocious neural differentiation. In agreement with above evidence, the immunostaining assays showed that TAM exposure greatly promoted the production of not only early-born, *Reln*+ Cajal-Retzius cells and deep layer, *Tbr1*+ neurons (Fig. 3A, B), but also superficial layer *Mef2c*+ cells (Fig. 3C) (Molyneaux et al., 2007). These results were further confirmed by ISH assay using a pan-neuronal marker, *Rbfox3* (Fig. 3D). Moreover, we also showed that TAM treatment at the peak of cortical neurogenesis (E13-14) dramatically increased *Tbr1*+ and *Mef2c*+ cells in the cortical plate at E14, while having little effect on the total number of *Reln*+ cells in the cortical marginal zone (MZ) (Sup. Fig. 2A). This may be because *Reln*+ cells are one type of the earliest born cortical neurons which differentiated before TAM administration (Marín-Padilla, 1998).

**The long-lasting effects of prenatal TAM exposure in postnatal offspring.** To evaluate the potential long-lasting effects of TAM exposure on cortical neurogenesis, we IP injected TAM to pregnant dams (C57BL/6) preceding neural tube closure (E8.5) and examined cortical neurogenesis at E18 and at postnatal day 30 (P30).

TAM treatment dramatically reduced the thickness of the cortical plate (Map2+) and the number of cortical neurons (Rbfox3+, Tbr1+) in both E18 and P30 offspring (Fig. 3E, F). In the hippocampus, prenatal TAM treatment also caused subtle but significant reduction of cell numbers in the CA1 and the DG (Fig. 3G). Moreover, administration of TAM at E8.5 severely impaired apical dendritic complexity in P30 brains, remarkably in the cortical marginal zone (Fig. 3H). Administration of TAM at E13 (the peak period of cortical neurogenesis) to an inbred strain (C57BL/6), an outbred mouse strain (CrI:CD1(ICR)), and a transgenic mouse line (Prom1CreER/ZsGreen (129S6/SvEvTac x C57BL/6NCrI)) also showed reduced number of cortical neurons (Sup. Fig. 2B, C), suggesting TAM treatment has long-lasting effects on cortical neurogenesis regardless of the genetic backgrounds.

In addition to cortical neurogenesis, in E8.5 TAM treated, P30 offspring, our data showed a significant reduction in the number of Olig2+ oligodendrocytes in the corpus callosum. The Cnp and Mbp staining also showed a thinner and disorganized axon track in the corpus callosum (Sup. Fig. 3A), suggesting prenatal TAM treatment impaired gliogenesis and/or dysregulated axon formation in postnatal offspring. We observed statistically non-significant reduction in the number of Gfap+ astrocytes in the corpus callosum, while Aldoc+ astrocytes remained unchanged in the cortex (Sup. Fig. 3B, C).

**Prenatal TAM exposure perturbed Wnt and BMP related signaling that has been shown to strongly correlate with neural progenitor maintenance, differentiation, and cortical areal organization.** We have shown that prenatal TAM administration has broad effects from NPC proliferation, and cell differentiation to neural circuit formation. To reveal underlying molecular mechanisms, we carried out gene regulatory network analysis using bigScale2 toolkit to identify hub genes that TAM employed to manipulate corticogenesis (Iacono et al., 2019). We chose to analyze NPC1/2 and CH clusters because the tight association between VZ NPC proliferation and cortical neurogenesis. The cortical hem, one of main brain patterning organizers, has been shown to regulate cortical patterning (Arnold Kriegstein, 2006; O'Leary et al., 2007).

A total of 3,035 cells (CTL, 1,908 cells; TAM, 1,127 cells) were analyzed to generate a gene expression correlation network using bigScale2 algorithm (Iacono et al., 2019). We discovered four major network modules in CTL and three modules in TAM treated cells (Fig. 4A, left panels). Compared with the CTL, the TAM network showed lower edges to node density (CTL, 6.89; TAM, 4.92) and modularity (CTL, 0.61, four modules; TAM, 0.29, three modules), suggesting the CTL network preserved a strong intra-modular connectivity and higher gene expression heterogeneity. Gene ontology (GO) enrichment analysis showed the four modules in the CTL, comprising genes mainly related to forebrain development (e.g. *Nfib*, *Dmrta2*, *Emx2*, *Wnt8b*, *Dmrt3*, *Axin2*, *Tcf4*, *Meis2*, *Lmo1*), cell cycle progression (e.g. *Top2a*, *Ccnb1*, *Cenpf*, *Ctcf*, *Nucks1*), ribonucleoprotein complex biogenesis (e.g. *Ncl*, *Npm1*), and ribosome assembly and translation regulation (e.g. *Btf3*, *Rpl12*, *Rps5*) (Fig. 4A, right panels). Compared to CTL, TAM treatment reduced the GO enrichments to three modules that comprised genes mainly related to projection assembly and Wnt signaling (e.g. *Lmx1a*, *Axin2*, *Sostdc1*, *Wnt8b*), cell cycle

progression (e.g. *Top2a*, *Ccnb1*, *Cenpf*), and ribosome assembly and translation regulation (e.g. *Ncl*, *Npm1*, *Rpl12*) (Fig. 4A, right panels). Closer inspection revealed the pagerank centrality of differentially expressed hub genes (orange-red color) reduced with random pattern in the gene regulatory network of TAM-treated NPCs and CH cells (Fig. 4A, left panel, orange-red color). The most striking example is the forebrain development module. The regulatory networks of the hub genes in this module (e.g. *Dmrta2*, *Wnt8b*, *Emx2*, *Dmrt3*) were greatly altered in TAM treated cells. For example, directly connected genes (nodes) (neighborhood of graph vertices) to *Dmrta2* and *Wnt8b* were reduced from 62 in CTL to 17 in TAM treated cells, and from 109 to 57, respectively, indicating weakened gene-gene interactions in TAM treated cells (Fig. 4A, left panels). These hub genes are critical components of multiple pathways that regulating neural progenitor maintenance, cortical neurogenesis, and patterning (i.e. Wnt, BMP, and Notch signaling pathways) (O'Leary et al., 2007; Young et al., 2017).

Intriguingly, a recent study by Young et al. showed that *Dmrta2* regulated *Hes1* and other proneural genes to maintain NPC fate. *Emx1*-cre conditional knockout of *Dmrta2* accelerated cell cycle exit, increased Eomes+ cells, and promoted transient neuronal differentiation (Young et al., 2017). In line with this evidence, an earlier study by Nakamura et. al. showed that knockout of *Hes1* null mice exhibited premature progenitor cell differentiation and reduction of multipotent progenitors' self-renewal activity (Yuki Nakamura, 2000). These phenotypes somewhat resemble our findings in TAM treated brains. scRNA-seq analysis showed that the expression level of *Dmrta2*, *Wnt8b*, a *Dmrta2* downstream target *Hes1*, a Wnt receptor subunit *Lrp6*, and a Bmp receptor subunit, *Avcr2b* was decreased in the TAM treated NPCs and/or CH cells (Fig. 4B). We further performed ISH assays to show that TAM treatment at E10 dramatically downregulated expression of *Dmrta2* and *Hes1* in the cortex, the cortical hem, and the hippocampus anlage at E12 (Fig. 4B, C). We also verified the reduced expression of a neural progenitor marker, *Sox3* in TAM treated brains (Fig. 4B, C) (Rogers et al., 2013). These results strongly suggested that prenatal TAM administration could trigger precocious cortical neural differentiation and suppress neural progenitor maintenance via suppressing the expression of *Dmrta2* and *Hes1*.

Along with neural progenitor fate maintenance, *Dmrta2*, a novel Wnt-dependent transcription factor, has been shown to be involved in cortical patterning (De Clercq et al., 2018; Saulnier et al., 2013). By using a conventional *Dmrta2* null mouse line, Saulnier et al. showed that in the major telencephalic patterning centers, the roof plate and cortical hem, loss of *Dmrta2* resulted in decreased expression of Wnt and BMP signaling genes, such as *Wnt8b* (Saulnier et al., 2013). Our scRNA-seq analysis showed TAM-treatment at E10 dysregulated the expression of Wnts, Bmps, receptors, and cytoplasmic modulators in cortical NPCs and cells in the cortical hem (Fig. 4A-C, Sup. Fig. 4A). We found TAM treatment caused expansion of *Wnt8b* expression from ventral-medial to dorsal-lateral region (Fig.4C). TAM also downregulated the expression level of a Wnt receptor subunit, *Lrp6* and a Bmp receptor subunit, *Avcr2b* in the cortex (Fig.4C). In addition to above genes, the single cell transcriptomic analysis showed TAM also perturbed the expression of genes that have been shown to be involved in Wnt, BMP, Fgf, Notch, and Shh pathways, such as frizzled class receptor 2 (*Fzd2*), glycogen synthase kinase 3 Beta (*Gsk3b*), Cyclin D1, D2, D3 (*Ccnd1-3*), inhibitor of DNA binding 4, HLH protein (*Id4*), protein tyrosine

phosphatase non-receptor type 11 (*Ptpn11*), Hes family BHLH transcription factor 5 (*Hes5*), SNW domain containing 1 (*Snw1*), c-terminal binding protein 1 (*Ctbp1*), histone deacetylase 1 (*Hdac1*), *Hdac2*, Gli family zinc finger 3 (*Gli3*), and protein kinase cAMP-dependent type I regulatory subunit alpha (*Prkar1a*) (Sup Fig. 4A). This evidence suggests that in addition to Wnt8b-Dmrta2-Hes1 axis of regulation, TAM could also exert its effects on NPC fate maintenance and specification through other signaling molecules.

In summary, our data revealed that TAM administration altered the landscape of gene regulatory network in NPCs and CH cells by reducing intra-modular connectivity and gene expression heterogeneity. Particularly, TAM administration at the early stage of cortical neurogenesis dramatically attenuated Wnt signaling network. As a proof-of-principle, we showed a tight link between TAM and Wnt8b-Dmrta2 regulatory axis in regulating NPC fate specification. TAM treatment dysregulates this pathway and lead to deficits in cortical neurogenesis and patterning in prenatal and postnatal offspring.

**TAM regulated cell proliferation and differentiation.** To test whether or not TAM can directly regulate cell proliferation and differentiation, we performed pair-cell assay *in vitro* (Liu et al., 2015). The E11 cortical progenitors were isolated and treated with a TAM active metabolite, 4-hydroxy-tamoxifen (4-OH-TAM). After 16hr, neurons and neural progenitors were detected by immunostaining. The pair-cell assay showed that 4-OH-TAM produced more neurons (Tuj1+ cells, N/N) than the control but reduced the numbers of progenitor pairs (P/P) and total Mki67+ cells (Sup. Fig. 5). The *in vitro* assay showed TAM can directly regulate progenitor cell proliferation and differentiation.

**TAM inhibited adult neural stem cell proliferation in both the SVZ of the caudate putamen and the DG of the hippocampus.** In adult mice, several studies reported acute but not long-lasting effects of TAM treatment on locomotion, exploration, and anxiety behaviors, and learning and memory in mice (Chen et al., 2002a, b; Rotheneichner et al., 2017; Vogt et al., 2008). Evidently, neurogenesis is disrupted with prenatal administration of TAM. Therefore, would postnatal administration of tamoxifen negatively impact adult neural stem cell proliferation? To study the potential influence of TAM in adult neurogenesis, we employed an established 5 days protocol that was used for CreER/LoxP dependent gene targeting in adult mice (Erdmann et al., 2007). We IP injected TAM (2mg/day) to male mice (C57BL/6) at P30-40 for continuous 5 days. BrdU was administrated on the second day of TAM injection. The brains were analyzed 5 days after the last TAM administration. We showed that TAM greatly reduced the number of BrdU and Mki67 labeled proliferating cells in the SVZ and in the DG (Fig. 5A). To test the TAM dosage effect, we reduced the TAM dose to 1mg/animal per day and shortened the treatment time to 2 days. The mice received additional BrdU on the first day of TAM injection. The brain samples were analyzed 2 days after the last TAM administration. We observed the same effect of reduced proliferating cells in the SVZ of the caudate putamen as in high TAM dosage group (2mg/day) (Fig. 5B). There was no



detectable cell apoptosis after 5 days of TAM treatment (2mg/animal/day) (Sup. Fig. 6A) and administration of TAM did not significantly change overall dendritic complexity in adult brains (Sup. Fig. 6B).

## Discussions

Estrogens have been shown to promote NPC proliferation and differentiation, neurite elongation, and synaptic formation during the later stage of corticogenesis (Beyer, 1999; Denley et al., 2018; McEwen and Alves, 1999). The current study revealed prenatal, low-dosage administration of an estrogen receptor modulator, TAM, promoted transient SVZ progenitor proliferation, led to precocious cortical neurogenesis, while inhibited VZ progenitor proliferation which in turn severely impaired cortical neurogenesis, cortical patterning, and dendritic morphogenesis in neonatal and postnatal offspring. It seems that TAM and estrogen treatments showed somewhat opposite phenomena in term of NPC proliferation and differentiation, suggesting TAM may function through interfere with estrogen signaling pathway. The single cell transcriptomic analysis showed that expression of major estrogen receptors, estrogen receptor 1 (*Esr1*), *Esr2*, G Protein-Coupled Estrogen Receptor 1 (*Gper1*), estrogen-related receptor beta (*Esrrb*), and a critical estrogen synthetic enzyme, aromatase (*Cyp19a1*) were undetectable at E12 in the telencephalon, while the expression of estrogen-related receptor alpha (*Esrra*) was low and TAM treatment at E10 did not alter its expression at E12 (Sup. Fig. 4B). Along with the evidence that 4-OH-TAM could directly regulate NPC proliferation and differentiation (Sup. Fig. 5), it seems that at the early stage of cortical neurogenesis (E10-12) TAM may directly interfere with normal cortical development via *Esrra* and/or *Gper1* or estrogen receptor-independent mechanisms (Bogush et al., 2018). In the meantime, the fact that a single dosage of prenatal TAM administration at early stage of brain development causes dystocia, indicates that the effect of TAM on pregnant dams can be long lasting and TAM exposure may indirectly influence cortical neurogenesis of fetuses.

The single cell transcriptomic analysis substantiates that prenatal TAM treatment altered gene-to-gene regulatory networks that regulate forebrain development, chromosome replication, cell cycle progression, and translation regulation in NPC and the cortical hem clusters. We showed that TAM administration drastically inhibited NPC proliferation, and thus led to impairment of cortical neurogenesis and patterning in neonatal and postnatal offspring. Mechanistically, we showed that prenatal TAM administration downregulated the expression of a Wnt related transcription factor *Dmrta2* and its effector *Hes1*. *Dmrta2* have been shown to play critical roles in NPC fate maintenance and differentiation (Young et al., 2017; Yuki Nakamura, 2000). TAM also downregulated the expression of Wnt and BMP receptors, *Lrp6* and *Avcr2b* in cortical NPCs. TAM induced perturbation of Wnt and BMP pathways could somewhat explain the underlying mechanism of cortical patterning changes in TAM treatment neonatal brains. Additionally, downregulation the expression of *Emx2*, *Dmrt3*, and *Gli3* may also contribute to cortical neurogenesis and patterning deficits in TAM treated brains (Fig. 4A, sup. Fig. 4A) (Saulnier et al., 2013). Moreover, the single cell transcriptomic analysis showed dramatical decrease in the numbers of NPCs expressing Wnt signaling-related genes (e.g. *Fzd2*, *Gsk3b*, *Ccnd1,2,3*), Tgf- $\beta$

pathway gene (*Id4*), Fgf pathway gene (*Ptpn11*), Notch pathway genes (*Hes5*, *Snw1*, *Ctbp1*, *Ctbp2*, *Hdac1*, *Hdac2*) and sonic hedgehog (Shh) pathway genes (*Prkar1a*, *Smo*) (Sup. Fig. 4A). Taken together, these data suggest that in addition to the Drmta2-Hes1-Wnt8b axis of regulation, other signaling molecules that could also be involved in TAM regulation of NPC fate maintenance and specification during corticogenesis, as well as dendritic morphogenesis and axon formation.

TAM inducible CreER/LoxP system laid the foundations of significant discoveries in adult and embryonic neural stem cell fate mapping (Berg et al., 2019; Bond et al., 2015; Fuentealba et al., 2015; Gao et al., 2014), gene functions (Kuo et al., 2006), as well as neuronal subtypes and activity dependent neural circuitry (Kim et al., 2017; Paul et al., 2017; Ye et al., 2016). Is the potential side effect of TAM a vulnerable Achilles' heel to cell lineage tracing and/or genetic targeting studies? Now, it is clear that prenatal, single dosage of TAM exposure dramatically changes the global gene expression landscapes of cells in the cerebral hemisphere, which has long lasting influence on cortical neurogenesis and patterning in perinatal and postnatal offspring. Therefore, special cautions should be taken when using TAM-induced CreER/LoxP system for neural lineage tracing study because it is not falsifiable due to lack of appropriate controls.

## Materials and Methods

**Experimental Animals.** Mice were kept and fed in standard conditions on a 12h light/dark cycle. Experimental procedures on animals were performed in accordance with the guidelines of UCLA Institutional Animal Care and Use Committee and UCLA Animal Research Committee. Three different genetic background lines were used: C57BL6/J, Crl:CD1(ICR), and Prom1creER/ZsGreen transgenic line, which was generated by crossing Prom1<sup>tm1(cre/ERT2)</sup>Gilb line (129S6/SvEvTac background, the Jackson Laboratory (JAX)) and Gt(ROSA)26S<sup>Of</sup>tm6(CAG-ZsGreen1)Hze (129S6/SvEvTac x C57BL/6NCrl background, JAX). Pregnancy was timed by daily monitoring for vaginal plugs.

Prenatal and perinatal brains were dissected without perfusion, and subsequently immersed overnight in 4% paraformaldehyde (PFA) in PBS. Adult mice were overdosed with isoflurane and perfused intracardially with PBS followed by 4% PFA. The brains were removed and stored in 4% PFA overnight at 4 °C. Fixed brains were coronally sectioned at 10-12µm for BrdU immunostaining and ISH, or at 20-60µm for free-floating immunostaining.

**TAM administration and fostering.** TAM was suspended in corn oil to a stock concentration of 20mg/ml (Sigma, T5648). The injection site was cleaned with ethanol. 750µg of tamoxifen was injected into the peritoneal cavity (Intraperitoneal injection, IP) with 1ml, 28G1/2 insulin syringe. Animals were monitored until proper post injection recovery was demonstrated. Prenatal administration of TAM caused mortality of pups was always observed in more than 60 Tam treated pregnant dams, which were IP injected with TAM at E8, E10, and E13. To circumvent this problem, a caesarean section was performed on pregnant mothers in the afternoon on E18.5

and pups were fostered to CD1 or 129S6 mothers.

TAM was IP injected to 4-6 weeks old C57BL/6J mice for 2 (1mg/mouse) or 5 days (2mg/mouse).

**Single cell transcriptomic analysis.** 750 $\mu$ g of Tam was IP injected to pregnant mice at embryonic day 10 (E10). The forebrains were collected at E12, dissociated in papain at a concentration of 2 mg/ml in Hibernate E-Ca (HE-Ca) (BrainBits, LLC.) at 30°C for 10min. The digested tissues were gently triturated 10 times with fire-polished pasture pipettes. The single cell suspension was filtered through a 40 $\mu$ m cell strainer, and then centrifuged at 200g for 5min at room temperature. The pellet was washed with PBS with 1% bovine serum albumin (BSA). The cell viability was accessed by trypan blue staining. The cells were diluted to a final concentration of 1x10<sup>6</sup>/ml in PBS with 0.04% BSA. The volume of single cell suspension that was required to generate 10,000 single cell GEMs (gel beads in emulsion) per sample was loaded onto the Chromium Controller (10x Genomics). Libraries were prepared using the Chromium v2 Single Cell 3' Library and Gel Bead Kit (10x Genomics) according to the manufacturer's specifications. Final library quantification and quality check was performed using a DNA 1000 chip (Agilent Technologies), followed by sequencing on Illumina NovaSeq 6000.

The raw reads were processed to molecule counts using the Cell Ranger pipeline (version 2.1.1, 10X Genomics) with default settings. The raw unique molecular identified (UMI) counts from Cell Ranger were processed with the Seurat R toolkit (version 3.0.1). Cells derived from the diencephalon were removed. Genes that were detected in less than 0.1% cells were discarded. Low-quality cells that had over 5% mitochondrial UMI counts were removed. Additionally, cells that contained under 400 gene counts or above 8100 gene counts, in the CTL dataset or cells contained either less than 500 gene counts or more than 7000 gene counts in the TAM dataset were removed. The cell numbers of CTL and TAM datasets were then normalized by random section of 4193 cells/condition. The gene expression for each cell was then normalized with default parameters. The top 2000 genes that exhibited high cell-to-cell variation in each dataset (CTL, TAM) were identified respectively via *FindVariableFeatures* function.

A list of CTL and TAM Seurat objects served as the input to identify anchors, which were subsequently used to integrate the two datasets using the function *IntegrateData*, with *dims* set to 18. Then the expression of each gene was scaled and unwanted sources of variation (UMI counts, mitochondrial contamination) were regressed out via *ScaleData* function. The first 20 principal components (PCs) were chosen to perform principal component analysis (PCA) through function *RunPCA*, followed by shared nearest neighbor (SNN) graph construction via *FindNeighbors* function and uniform manifold approximation and projection (UMAP) dimension reduction using function *RunUMAP*. Based on UMAP plot, fourteen clusters were classified using the function *FindClusters* with resolution parameter set to 0.4. To identify the marker genes of each cluster, function *FindAllMarkers* with likelihood-ratio test was applied. According to expression of well-established marker gene sets, the 14 clusters were manually annotated as major classes of cells: neuronal cells (including pallial neural progenitors, subpallial

neural progenitors, neuroblasts, excitatory neurons, inhibitory neurons, Cajal-Retzius cells, Cck+ neurons and cortical hem cells), and non-neuronal cells (consisting of neural crest cells, red blood cells, endothelial cells, microglia, and pericytes).

The fractions of major types of cells in each dataset were calculated as the percentage of number of each cell type in total cell number of each dataset. The positive ratio of a specific gene in neuronal cells was defined as the ratio of gene positive cells (with log<sub>2</sub> transferred UMI counts greater than 0) in each dataset.

The NPC1 (pallial neural progenitors), NPC2 (subpallial neural progenitors), and CH (cortical hem) clusters of each condition (CTL, TAM) were merged and served as the input for inferring the putative gene-to-gene correlated network using bigSca2 algorithm (Iacono et al., 2019). Specifically, two matrices with 17071 genes' expression counts for 1908 CTL and 1127 TAM cells were used to infer the network by the default parameters (i.e. clustering = 'recursive', quantile.p = 0.998). The network centrality Pagerank was chosen to represent the gene essentiality. The network was then visualized via igraph R package (version 0.7.1), with layout setting layout.fruchterman.reingold. Communities in each network were discovered using *cluster\_label\_prop* function (igraph 1.2.4.1), and clusters consisting of over 100 genes were determined as main communities. The genes in each main community were set as input for gene ontology (GO) enrichment analysis using the R package clusterProfiler (version 3.12.0).

**BrdU administration.** BrdU was suspended in water to a working concentration of 10mg/ml (Sigma, B5002). Prior to injection, animals were weighed. After cleaning injection site with ethanol, BrdU solution was administered through IP injection at 100mg/kg. Animals were monitored until proper post injection recovery was demonstrated.

**Studying cell cycle with 5-ethynyl-2'-deoxyuridine (EdU) and bromodeoxyuridine (BrdU).** The pregnant mice were treated with TAM at E11. At E12, EdU (100mg/kg, Abcam ab219801) was IP delivered to the TAM treated mice followed by BrdU (100mg/kg) labeling after 2hr. The embryonic brains were fixed with 4%PFA after 30min. The cells in the initial EdU-labeled cohort that left S-phase during the interval (Ti) between EdU and BrdU (2hr) were labeled with EdU but not BrdU (the leaving fraction, L). The proportion of cells labeled with BrdU is designated S. The length of S-phase (Ts) can be calculated using the formula:  $T_s/T_i=S/L$ .

**In vitro TAM assay.** Telencephalons of E11 CD-1 embryos were dissected and digested with papain in HBSS at 30°C for 5-10min. The digested tissue was dissociated using fire-polished pasture pipettes. Dissociated single cells were collected by centrifugation and resuspended in neurobasal medium (ThermoFisher Scientific, 21103049) supplied with B27 (ThermoFisher Scientific, 17504044), bFGF (Sigma, F3685), EGF (Sigma E4127), and 1μM 4-OH-TAM (Sigma, H6278). The single cell suspension was plate on Poly-L-Ornithine, hydrochloride (Sigma, P-2533) and Fibronectin Human Protein (ThermoFisher Scientific, 33016015) coated coverslips in 24-

well plates. For controls, dissociated cells were cultured in neurobasal medium supplied with B27, bFGF, and EGF. 16hrs after plating, the cells were fixed with 4% PFA at room temperature.

**In situ hybridization (ISH).** Fluorescent ISH assay was performed followed manufacturer's instructions (Multiplex Fluorescent Reagent Kit v2, Advanced Cell Diagnostics, Inc.). RNAscope Probes were *Fezf2* (313301-C3), *Pax6* (412821), *Eomes* (429641-C3), *Rbfox3* (313311-C2), *Cdkn1c* (458331-C2), *Wnt8b* (405071), *Wnt3a* (405041-C2), *Hes1* (417701-C4), *Sox3* (customized probe), *Dmrta2* (customized probe), *Acvr2b* (469791-C3), *Lrp6* (315801-C2), *Mdgal* (546411), *Cyp26b1* (524001-C3), *Crym* (466131-C3), and *Epha7* (430961-C2).

**Immunohistochemistry.** The primary antibodies used in this study were BrdU (Abcam ab6326, 1:100; ab220076 1:300, ), MKi67(Abcam ab15580, 1:350), phospho-Histone H3 (Ser10) (Cell Signaling 9701S, 1:300), Map2 (Abcam ab92434, 1:350), Tbr1 (Abcam ab31940, 1:1000), Pax6 (Isbio Is-c179903), Eomes (Abcam ab183991, 1:500 and EMD Millipore ab15894, 1:250), Rbfox3 (EMD Millipore MAB377, 1:50 and Invitrogen 7011084, 1:200, and Encor CPCA-FOX3, 1:500), Bcl11b (Abcam ab18465 (25B6), 1:500), Mef2c (Genetex GTX-105433, 1:750), Mbp (Myelin basic protein) (Encor CPCA-MBP, 1:5000), Cnp (2', 3'-cyclic nucleotide 3'-phosphodiesterase) (Encor MCA-1H10), Olig2 (EMD Millipore, 1:150), Aldoc (Encor MSA-4A9, 1:200) (Halford et al., 2017), and Gfap (Abcam ab7260, 1:500). For BrdU/Mki67 staining, sections were first stained with Mki67. After secondary antibody incubation, the sections were post-fixed with 4% PFA for 30 minutes. Then, the sections were treated with 2N HCl for 20 minutes at 37°C, neutralized with 0.5% sodium borate buffer, and incubated overnight with BrdU.

Fluorophore-conjugated secondary antibodies were purchased from ThermoFisher Scientific and Jackson ImmunoResearch.

**Golgi-Cox Staining.** TAM was IP injected to adult mice (~P60) for 5 days (2mg/mouse) and the brains were removed 14 days after the last TAM injection. The Golgi staining was carried out following manufacturer's instructions (IHCWORLD, IW-3023).

**Imaging and Statistical Analysis.** Stained sections were imaged with Zeiss LSM800 confocal microscope as described in our previous work(Lin et al., 2017). Images obtained were processed and quantified with Imaris software. Statistical analysis of the data was carried out with Prism 6. Unpaired, two-tailed T-tests with equal standard deviation were used to assess statistical significance between independent experimental groups. All reported significance levels represent two-tailed values.

## Figure Legends

**Figure 1. Prenatal TAM exposure impaired cortical neurogenesis.** (A) TAM was intraperitoneally injected into pregnant mice at E10 (750 $\mu$ g/animal). The brain was removed at E18. TAM treatment reduced the size of the cerebral hemispheres and the olfactory bulbs. Nissl staining showed an enlargement of the lateral ventricles (lower left panels). Map2 immunostaining shows TAM treatment at E10 dramatically thinned cortical plate at E18. CTL, oil control; TAM, tamoxifen treated; Map2, microtubule associated protein 2. Scale bar, 50 $\mu$ m. (B) Prenatal TAM exposure at E10 altered cortical area patterning at E18 in the motor cortex (*Cyp26b1*, *Epha7*), the somatosensory cortex (*Mdga1*), and the visual cortex (*Crym*, *Epha7*). Scale bar, 400 $\mu$ m. *Cyp26b1*, cytochrome P450 family 26 subfamily b member 1; *Epha7*, EPH receptor a7; *Mdga1*, MAM domain containing glycosylphosphatidylinositol anchor 1; *Crym*, Crystallin Mu. (C) Schematic overview of single cell isolation and 10X Genomics scRNA-seq. TAM, tamoxifen IP injection at E10. Visualization of single cell data by uniform manifold approximation and projection (UMAP) plot of clustering of E12 cells. NPC1, pallial neural progenitor cells; NPC2, subpallial neural progenitor cells; Inh1, inhibitory neurons (mainly derived from the medial ganglionic eminence (MGE)); Inh2, inhibitory neurons (mainly derived from the lateral ganglionic eminence (LGE) or the caudal ganglionic eminence (CGE)); Ex, excitatory neuros; NB, neuroblasts; CR, Cajal-Retzius cells; CH, cortical hem neurons; NC, neural crest cells; RBC, red blood cells; EC, endothelial cells; MG, microglia; PC, pericytes. (D) Heatmap shows top cell-type-specific genes expressed in all clusters defined in (C). (E) Pie chart shows major cell-type percentages. (F) Patterning analysis of cell fate and cell cycle markers. Circles represent fraction of positive cells in each cluster. Pax6, paired box 6; Eomes, eomesodermin; Mki67, marker of proliferation Ki-67; Cdkn1c, cyclin dependent kinase inhibitor 1C; Reln, reelin; Tbr1, T-box, brain 1; Mef2c, myocyte enhancer factor 2C; Rbfox3, RNA binding Fox-1 homolog 3.

**Figure 2. Prenatal TAM administration inhibited neural progenitor proliferation.** (A) In situ hybridization (ISH) shows administration of TAM at early brain development (E10) reduced the number of ventricular zone (VZ) progenitors (*Pax6*<sup>+</sup>), while increased the number of SVZ progenitors (*Eomes*<sup>+</sup>) (*Pax6*<sup>+</sup> cells: p=0.0250; *Eomes*<sup>+</sup> cells: p=0.0228, Mann Whitney test, CTL n=7, TAM n=14). Scale bar, 20 $\mu$ m. (B) In agreement with the ISH assay in (A), Pax6 and Eomes immunostaining shows TAM significantly inhibited VZ progenitor proliferation, while increasing the number of cells in the SVZ (*Pax6*<sup>+</sup> cells: p<0.0001; *Eomes*<sup>+</sup> cells: p=0.0005, Mann Whitney test, CTL n=14, TAM n=14). Scale bar, 30 $\mu$ m. (C) Administration of TAM at E10 dramatically reduced numbers of cells in S-phase (BrdU<sup>+</sup>) and total cells in the cell cycle (*Mki67*<sup>+</sup>) (BrdU, p=0.0264, *Mki67*, p=0.0007, Mann Whitney test, CTL n=19, TAM n=18). BrdU was IP injected at E12. Samples were collected 30min after BrdU administration. Scale bar, 30 $\mu$ m. (D) Kinetic analysis of S-phase cell cycle progression. Prenatal TAM exposure increased the S-phase length (P<0.0001, CTL n=20, TAM n=21). TAM was administrated at E11. EdU was injected at E12. BrdU was injected 2hr after EdU administration. The brains were collected 30min after EdU injection. The enlarged images on the right showed quantification of BrdU (red color)

and EdU (green color) single or double positive cells. The Edu/BrdU double positive cells were labeled with yellow ovals. Scale bar, 20 $\mu$ m. **(E)** TAM administration increased the number of basal dividing cells (phospho-Histone H3<sup>+</sup>), which may increase number of Eomes<sup>+</sup> SVZ cells and thus led to precocious neurogenesis ( $p=0.0236$ , Mann Whitney test, CTL  $n=5$ , TAM  $n=8$ ). Phosphorylation at Ser10 of histone H3 is tightly correlated with chromosome condensation during mitosis. Scale bar, 20 $\mu$ m. **(F)** *Cdkn1c* ISH showed prenatal administration of TAM at E10 detained cells in G1-phase ( $p=0.0044$ , Mann Whitney test, CTL  $n=12$ , TAM  $n=12$ ). Scale bar, 30 $\mu$ m. Error bars, standard division.

**Figure 3. Prenatal TAM administration promotes precocious neurogenesis and has long-lasting effects on corticogenesis in postnatal offspring.** **(A-D)** Administration of TAM at E10 increased numbers of Reelin (Reln) positive, Cajal–Retzius cells at E12 ( $p=0.0115$ , Mann-Whitney test, CTL  $n=7$ , Tam  $n=9$ , scale bar, 30 $\mu$ m), Tbr1<sup>+</sup> early born neurons ( $p=0.0037$ , Mann-Whitney test, CTL  $n=8$ , TAM  $n=7$ , scale bar, 30 $\mu$ m), and superficial layer neurons (Mef2c<sup>+</sup> cells) ( $p<0.0001$ , Mann-Whitney test, CTL  $n=20$ , TAM  $n=20$ ; scale bar, 20 $\mu$ m). ISH assay shows prenatal TAM exposure at E10 transiently increased the total number of *Rbfox3*<sup>+</sup> postmitotic neurons at E12 ( $p=0.0354$ , Mann-Whitney test, CTL  $n=10$ , TAM  $n=10$ ). Scale bars, 10 $\mu$ m and 2 $\mu$ m (insert). Tbr1, T-Box, brain 1; Mef2c, myocyte enhancer factor 2C; Map2, microtubule associated protein 2. **(E)** TAM was administrated at E8.5. Cortical neurons were significantly reduced in E18 brains (*Rbfox3*,  $p=0.0104$ , Mann-Whitney test, CTL  $n=15$ ; TAM  $n=18$ ; *Map2*  $p<0.0001$ , Mann-Whitney test, CTL  $n=20$ ; TAM  $n=35$ ). Scale bar, 80 $\mu$ m. **(F)** Prenatal TAM exposure at E8.5 impaired cortical neurogenesis in P30 offspring (*Rbfox3*,  $p<0.0001$ , Mann-Whitney test, CTL  $n=15$ ; TAM  $n=18$ ; *Tbr1*,  $p=0.0044$ , Mann-Whitney test, CTL  $n=8$ ; TAM  $n=8$ ). Scale bar, 100 $\mu$ m. **(G)** Prenatal TAM administration at E8.5 perturbed neurogenesis in the hippocampus in P30 offspring. The CA1,  $p=0.0064$ , Mann-Whitney test, CTL  $n=18$ ; TAM  $n=18$ . Scale bars, 200 $\mu$ m and 20 $\mu$ m. The DG,  $p=0.0141$ , Mann-Whitney test, CTL  $n=18$ ; TAM  $n=18$ . Scale bars, 200 $\mu$ m and 20 $\mu$ m (zoomed in images). **(H)** TAM treatment decreased dendrite complexity in P30 offspring. Dendritic morphology was quantified using Imaris filament function, statistics denoted the number of branching points ( $p=0.0002$ , Mann-Whitney test, CTL  $n=9$ ; TAM  $n=9$ ). The right panels show enlarged the box areas in the left two panels and the surface model for dendrite quantification. Scale bar, 20 $\mu$ m. Error bars, standard division.

**Figure 4. Prenatal TAM administration perturbed Dmrta2-Hes1, Wnt, and Bmp signaling pathways.** **(A)** The left panels show CTL and TAM gene regulatory network analysis of single cell transcriptomes of NPC and cortical hem (CH) clusters. The node size is proportional to its pagerank centrality. The orange-red dots show genes in the intersection of three gene sets: 1) top 200 differentially expressed genes identified using Seurat package FindAllMarkers function between CTL and TAM in NPC&CH clusters; 2) top 200 genes with the biggest changed in pagerank absolute value between CTL and TAM; 3) genes with over 0.95 quantile of pagerank

centrality. The right panel is GO enrichment of genes with the most affected pagerank centrality. **(B)** The Dotplot shows prenatal TAM administration reduced the number of cells expressing *Dmrta2*, *Hes1*, *Sox3*, *Lrp6*, or *Acvr2b*. **(C)** ISH assays show reduced number of cells expressing *Dmrta2*, *Hes1*, and *Sox3* in TAM treated brains (*Dmrta2*,  $p=0.0329$ , CTL  $n=12$ , TAM  $n=12$ ; *Hes1*,  $p<0.0001$ , CTL  $n=15$ , TAM  $n=15$ ; *Sox3*,  $p=0.0318$ , CTL  $n=12$ , TAM  $n=12$ ). Scale bars,  $200\mu\text{m}$  and  $20\mu\text{m}$  (zoomed in images). TAM treatment extended *Wnt8b* expression laterally in the cortex ( $p=0.0009\sim<0.0001$ , 2-way ANOVA, CTL  $n=9$ , TAM  $n=9$ ). The cortex above the CH was separated by continuous bins and ISH staining puncta were quantified in each bin. The zoomed in images on the right showed bin-7 and -8. N.S., non-significant. Scale bar,  $100\mu\text{m}$  and  $10\mu\text{m}$  (zoomed in images). TAM treatment decreased numbers of cells expressing a Wnt receptor subunit, *Lrp6* and a Bmp receptor subunit, *Acvr2b* (*Lrp6*,  $p=0.0117$ , CTL  $n=8$ , TAM  $n=8$ ; *Acvr2b*,  $p=0.0008$ , CTL  $n=13$ , TAM  $n=8$ ). Scale bar,  $200\mu\text{m}$  and  $20\mu\text{m}$  (zoomed in images). Error bars, standard division.

**Figure 5. TAM inhibits adult neural stem cell proliferation in both the SVZ of the forebrain and the DG of the hippocampus.** **(A)** 4-6-week-old mice were given 2mg TAM per day for 5 consecutive days. BrdU was administered on the second day of TAM injection. Samples were collected 10 days after the initial TAM administration (upper left panel). The lower panels show that in the SVZ, TAM treatment dramatically decreased number of cells expressing either BrdU or Mki67 (BrdU,  $p=0.0187$ , Mann-Whitney test, CTL  $n=9$ ; TAM  $n=6$ ; Mki67,  $p=0.0021$ , Mann-Whitney test, CTL  $n=12$ ; TAM  $n=12$ ). Scale bar,  $50\mu\text{m}$ . LV, lateral ventricle. The lower panels show that in the DG, prenatal TAM administration had lifelong effects on cell proliferation (BrdU,  $P<0.0001$ , Mann-Whitney test, CTL  $n=12$  TAM  $n=12$ ; Mki67,  $p=0.0050$ , Mann-Whitney test, CTL  $n=12$ ; TAM  $n=12$ ). Scale bar,  $100\mu\text{m}$ . Error bars, standard division. **(B)** 4-6 weeks old mice were given 1mg TAM per day for 2 days, with BrdU administration on the second day. Samples were collected 2 days after the initial TAM administration. TAM treatment decreased the numbers of BrdU+ and Mki67+ cells in the SVZ (BrdU,  $p<0.0001$ , Mann-Whitney test, CTL  $n=36$ ; TAM  $n=31$ ; Mki67,  $p=0.0401$ , Mann-Whitney test, CTL  $n=36$ ; TAM  $n=31$ ). Scale bar,  $50\mu\text{m}$ .

**Supplementary Figure 1. Prenatal TAM exposure impaired neural progenitor proliferation by interfering with cell cycle progression.** **(A)** To quantify cells that express *Pax6*, *Eomes*, or both, the nuclei were marked with the Imaris create surface tool. The *Pax6* and *Eomes* puncta were filtered based on their localization. Only a nucleus surface containing more than three puncta within was counted as a positive cell. **(B)** Prenatal TAM administration at the peak period of cortical neurogenesis (E13) dramatically reduced the number of cells in the S-phase (BrdU pulse labeling at E14) and total number of proliferating cells (Mki67+) (BrdU,  $p=0.0010$ , Mki67,  $p<0.0001$ , Mann Whitney test, CTL  $n=13$ , TAM  $n=18$ ). Samples were collected 30min after BrdU administration. Scale bar,  $60\mu\text{m}$ . **(C)** *Cdkn1c* ISH assay suggested that prenatal administration of TAM at E13 promoted cells



entering G1-phase. Scale bar, 30 $\mu$ m. Error bar, standard division. **(D)** TUNEL assay shows that prenatal administration of TAM (2mg/animal) did not cause cell apoptosis.

**Supplementary Figure 2. Prenatal TAM exposure impairs cortical neurogenesis.** **(A)** Administration of TAM at the peak period of cortical neurogenesis (E13) did not change the number of Reln+ Cajal–Retzius cells at E14 ( $p=0.5179$ , Mann-Whitney test, CTL  $n=17$ , TAM  $n=21$ ). Scale bar, 30 $\mu$ m. TAM transiently increased number of Tbr1+ early born neurons and superficial layer Mef2c+ cells in prenatal brains (Tbr1,  $p=0.0002$ , Mann-Whitney test, CTL  $n=20$ , TAM  $n=17$ ; Mef2c,  $p<0.0001$ , Mann-Whitney test, CTL  $n=20$ , TAM  $n=20$ ). Scale bars, 30 $\mu$ m (Tbr1) and 20 $\mu$ m (Mef2c). **(B)** Administration of TAM at the peak period of cortical neurogenesis (E13) reduced the number of Rbfox3+ cortical neurons in E18 brains. Scale bar, 100 $\mu$ m. **(C)** Prenatal administration of TAM during early brain development reduced the number of cortical neurons in an outbred strain ICR CD1 and Prom1creER/ZsGreen transgenic mouse line (129S6/SvEvTac background). Scale bar, 100 $\mu$ m.

**Supplementary Figure 3. The long-lasting effects of prenatal TAM administration on astroglialogenesis in postnatal offspring.** **(A)** Early prenatal TAM treatment impaired gliogenesis. Olig2-, Mbp-, and Cnp-positive signals decreased in the corpus collosum of TAM treated brain (Olig2+ cells,  $p=0.0425$ , Mann-Whitney test, CTL  $n=14$ ; TAM  $n=14$ ). Scale bar, 100 $\mu$ m. Olig2, oligodendrocyte transcription factor 2; Mbp, myelin basic protein; Cnp, 2'3' cyclic nucleotide 3' phosphodiesterase. **(B, C)** We did not detect a significant alteration in the number of astrocytes in both the corpus collosum (B) and the cortex (C) of E8.5 TAM treated brain (B, Gfap+ cells,  $p=0.7198$ , Student's t-test, CTL  $n=14$ , TAM  $n=14$ ; C, Aldoc+ cells,  $p=0.0592$ , Student's t-test, CTL  $n=18$ , TAM  $n=15$ ; ). Gfap, glial fibrillary acidic protein; Aldoc, aldolase, fructose-bisphosphate C. Scale bar, 80 $\mu$ m. Error bars, standard division.

**Supplementary Figure 4. Gene expression that was altered by prenatal TAM administration.** **(A)** Signaling pathways that may be involved in cell proliferation, differentiation, and brain area patterning. The size of dot shows the percentage of cells expressing detectable target genes in each cluster. **(B)** Violin plot combined with box plot shows the overall expression of estrogen signaling related genes.

**Supplementary Figure 5. TAM directly regulated neural progenitor proliferation and neurogenesis.** **(A)** *In vitro* cell proliferation assay showed that treatment of E11 cortical NPCs with 4-hydroxytamoxifen (4-OH-TAM) significantly increased new born neurons (upper panels, Tuj1+), while decreased number of progenitor cells (middle panels, Nestin+) (N/N:  $p=0.0008$ ; P/P:  $p<0.0001$ ; N/P:  $p=0.5360$ , Mann Whitney test, CTL  $n=34$ , TAM  $n=33$ ). Scale bars, 5 $\mu$ m(N/N), 2 $\mu$ m(P/P), 3 $\mu$ m(N/P). N, neuron, P, progenitor. Tuj1, neuron-specific class III  $\beta$ -tubulin. **(B)** Treatment of E11 cortical NPCs with 4-OH-TAM dramatically reduced Mki67+ proliferating cells

( $p < 0.0001$ , Mann Whitney test, CTL  $n=17$ , TAM  $n=19$ ). Scale bar,  $20\mu\text{m}$ . Error bars, standard division.

**Supplementary Figure 6. Administration of TAM in adult neither caused cell death nor drastically reduced dendritic complexity.** (A) TUNEL assay shows that administration of TAM in adult mice at  $2\text{mg}/\text{animal}$  for 5 days did not cause cell death in the SVZ and the DG area. CPu, caudate putamen, LV, lateral ventricle, MZ, marginal zone, DG, dentate gyrus. (B) Golgi staining shows that administration of TAM in adult mice did not dramatically alter dendritic complexity of cortical neurons ( $p=0.6898$ , Student's  $t$ -test, CTL  $n=29$ , TAM  $n=65$ ). Scale bar,  $100\mu\text{m}$ .

### Acknowledgements

We thank the Intellectual and Developmental Disabilities Research Center (IDDR) at the University of California, Los Angeles (UCLA) supported by NIH Grant U54HD087101. This work was supported by NIH/National Institute of Mental Health (NIMH) Grant 5R21MH115382 (Q.L. and Y.E.S.).

### Author contributions

Q.L., Y.E.S. C.M.L.; L.Q. Z. designed research; C.M.L., L.Q. Z., J.P.L., J.Y.S., Y.N.G. J.R.W., X.J.S., N.B., J.B.W. performed research and scRNA-seq data analysis; Q.L, C.M.L., L.Q.Z. and Y.E.S. wrote the paper.

### References

- Arnold Kriegstein, S.N., Verónica Martínez-Cerdeño (2006). Patterns of neural stem and progenitor cell division may underlie evolutionary cortical expansion. *Nature Reviews Neuroscience* 7, 883–890
- Barthelme, L., and Gateley, C.A. (2004). Tamoxifen and pregnancy. *Breast* 13, 446-451.
- Berg, D.A., Su, Y., Jimenez-Cyrus, D., Patel, A., Huang, N., Morizet, D., Lee, S., Shah, R., Ringeling, F.R., Jain, R., *et al.* (2019). A Common Embryonic Origin of Stem Cells Drives Developmental and Adult Neurogenesis. *Cell* 177, 654-668 e615.
- Beyer, C. (1999). Estrogen and the developing mammalian brain. *Anatomy and embryology* 199, 379-390.
- Bogush, T.A., Polezhaev, B.B., Mamichev, I.A., Bogush, E.A., Polotsky, B.E., Tjulandin, S.A., and Ryabov, A.B. (2018). Tamoxifen Never Ceases to Amaze: New Findings on Non-Estrogen Receptor Molecular Targets and Mediated Effects. *Cancer investigation* 36, 211-220.
- Bond, A.M., Ming, G.L., and Song, H. (2015). Adult Mammalian Neural Stem Cells and Neurogenesis: Five Decades Later. *Cell Stem Cell* 17, 385-395.
- Braems, G., Denys, H., De Wever, O., Cocquyt, V., and Van den Broecke, R. (2011). Use of tamoxifen before and during pregnancy. *The oncologist* 16, 1547-1551.
- Butler, A., Hoffman, P., Smibert, P., Papalexi, E., and Satija, R. (2018). Integrating single-cell transcriptomic data across different conditions, technologies, and species. *Nature biotechnology* 36, 411-420.

- Chen, D., Wu, C.F., Shi, B., and Xu, Y.M. (2002a). Tamoxifen and toremifene cause impairment of learning and memory function in mice. *Pharmacol Biochem Behav* *71*, 269-276.
- Chen, D., Wu, C.F., Shi, B., and Xu, Y.M. (2002b). Tamoxifen and toremifene impair retrieval, but not acquisition, of spatial information processing in mice. *Pharmacol Biochem Behav* *72*, 417-421.
- Cuzick, J., Sestak, I., Cawthorn, S., Hamed, H., Holli, K., Howell, A., Forbes, J.F., and Investigators, I.-I. (2015). Tamoxifen for prevention of breast cancer: extended long-term follow-up of the IBIS-I breast cancer prevention trial. *The lancet oncology* *16*, 67-75.
- De Clercq, S., Keruzore, M., Desmaris, E., Pollart, C., Assimacopoulos, S., Preillon, J., Ascenzo, S., Matson, C.K., Lee, M., Nan, X., *et al.* (2018). DMRT5 Together with DMRT3 Directly Controls Hippocampus Development and Neocortical Area Map Formation. *Cereb Cortex* *28*, 493-509.
- Denley, M.C.S., Gatford, N.J.F., Sellers, K.J., and Srivastava, D.P. (2018). Estradiol and the Development of the Cerebral Cortex: An Unexpected Role? *Frontiers in neuroscience* *12*, 245.
- Erdmann, G., Schutz, G., and Berger, S. (2007). Inducible gene inactivation in neurons of the adult mouse forebrain. *BMC Neurosci* *8*, 63.
- Fuentealba, L.C., Rompani, S.B., Parraguez, J.I., Obernier, K., Romero, R., Cepko, C.L., and Alvarez-Buylla, A. (2015). Embryonic Origin of Postnatal Neural Stem Cells. *Cell* *161*, 1644-1655.
- Gao, P., Postiglione, M.P., Krieger, T.G., Hernandez, L., Wang, C., Han, Z., Streicher, C., Papusheva, E., Insolera, R., Chugh, K., *et al.* (2014). Deterministic progenitor behavior and unitary production of neurons in the neocortex. *Cell* *159*, 775-788.
- Georgala, P.A., Manuel, M., and Price, D.J. (2011). The generation of superficial cortical layers is regulated by levels of the transcription factor Pax6. *Cereb Cortex* *21*, 81-94.
- Halford, J., Shen, S., Itamura, K., Levine, J., Chong, A.C., Czerwieniec, G., Glenn, T.C., Hovda, D.A., Vespa, P., Bullock, R., *et al.* (2017). New astroglial injury-defined biomarkers for neurotrauma assessment. *J Cereb Blood Flow Metab* *37*, 3278-3299.
- Henzel, M.J., Wei, Y., Mancini, M.A., Van Hooser, A., Ranalli, T., Brinkley, B.R., Bazett-Jones, D.P., and Allis, C.D. (1997). Mitosis-specific phosphorylation of histone H3 initiates primarily within pericentromeric heterochromatin during G2 and spreads in an ordered fashion coincident with mitotic chromosome condensation. *Chromosoma* *106*, 348-360.
- Iacono, G., Massoni-Badosa, R., and Heyn, H. (2019). Single-cell transcriptomics unveils gene regulatory network plasticity. *Genome biology* *20*, 110.
- Imayoshi, I., Sakamoto, M., Yamaguchi, M., Mori, K., and Kageyama, R. (2010). Essential roles of Notch signaling in maintenance of neural stem cells in developing and adult brains. *J Neurosci* *30*, 3489-3498.
- Jyoti, B., Bharat, C., Ankita, N., Munita, B., and Sudeep, G. (2016). Pregnancy on tamoxifen: Case-report and review of literature. *South Asian J Cancer* *5*, 209-210.
- Kim, C.K., Ye, L., Jennings, J.H., Pichamoorthy, N., Tang, D.D., Yoo, A.W., Ramakrishnan, C., and Deisseroth, K. (2017). Molecular and Circuit-Dynamical Identification of Top-Down Neural Mechanisms for Restraint of Reward Seeking. *Cell* *170*, 1013-1027 e1014.
- Koca, E., Kuzan, T.Y., Babacan, T., Turkbeyler, I.H., Furkan, S., and Altundag, K. (2013). Safety of tamoxifen during pregnancy: 3 case reports and review of the literature. *Breast Care (Basel)* *8*, 453-454.

Kretzschmar, K., and Watt, F.M. (2012). Lineage tracing. *Cell* *148*, 33-45.

Kuo, C.T., Mirzadeh, Z., Soriano-Navarro, M., Rasin, M., Wang, D., Shen, J., Sestan, N., Garcia-Verdugo, J., Alvarez-Buylla, A., Jan, L.Y., *et al.* (2006). Postnatal deletion of Numb/Numbl like reveals repair and remodeling capacity in the subventricular neurogenic niche. *Cell* *127*, 1253-1264.

Lin, Q., Ponnusamy, R., Widagdo, J., Choi, J.A., Ge, W., Probst, C., Buckley, T., Lou, M., Bredy, T.W., Fanselow, M.S., *et al.* (2017). MicroRNA-mediated disruption of dendritogenesis during a critical period of development influences cognitive capacity later in life. *Proc Natl Acad Sci U S A* *114*, 9188-9193.

Liu, K., Lin, Q., Wei, Y., He, R., Shao, X., Ding, Z., Zhang, J., Zhu, M., Weinstein, L.S., Hong, Y., *et al.* (2015). Galphas regulates asymmetric cell division of cortical progenitors by controlling Numb mediated Notch signaling suppression. *Neurosci Lett* *597*, 97-103.

Lizen, B., Claus, M., Jeannotte, L., Rijli, F.M., and Gofflot, F. (2015). Perinatal induction of Cre recombination with tamoxifen. *Transgenic research* *24*, 1065-1077.

Marín-Padilla, M. (1998). Cajal–Retzius cells and the development of the neocortex. *Trends Neurosci* *21*, 64-71.

Martynoga, B., Morrison, H., Price, D.J., and Mason, J.O. (2005). Foxg1 is required for specification of ventral telencephalon and region-specific regulation of dorsal telencephalic precursor proliferation and apoptosis. *Developmental biology* *283*, 113-127.

McEwen, B.S., and Alves, S.E. (1999). Estrogen actions in the central nervous system. *Endocrine reviews* *20*, 279-307.

Metzger, D., Clifford, J., Chiba, H., and Chambon, P. (1995). Conditional site-specific recombination in mammalian cells using a ligand-dependent chimeric Cre recombinase. *Proc Natl Acad Sci U S A* *92*, 6991-6995.

Miller, F.D., and Gauthier, A.S. (2007). Timing is everything: making neurons versus glia in the developing cortex. *Neuron* *54*, 357-369.

Molyneaux, B.J., Arlotta, P., Menezes, J.R., and Macklis, J.D. (2007). Neuronal subtype specification in the cerebral cortex. *Nat Rev Neurosci* *8*, 427-437.

O'Leary, D.D., Chou, S.J., and Sahara, S. (2007). Area patterning of the mammalian cortex. *Neuron* *56*, 252-269.

Paul, A., Crow, M., Raudales, R., He, M., Gillis, J., and Huang, Z.J. (2017). Transcriptional Architecture of Synaptic Communication Delineates GABAergic Neuron Identity. *Cell* *171*, 522-539 e520.

Paul S. Danielian, D.M., David H. Rowitch, Simon K. Michael and Andrew P. McMahon (1998). Modification of gene activity in mouse embryos in utero by a tamoxifen-inducible form of Cre recombinase. *Current Biology* *8*, 1323–1326.

Rogers, N., Cheah, P.S., Szarek, E., Banerjee, K., Schwartz, J., and Thomas, P. (2013). Expression of the murine transcription factor SOX3 during embryonic and adult neurogenesis. *Gene expression patterns : GEP* *13*, 240-248.

Rotheneichner, P., Romanelli, P., Bieler, L., Pagitsch, S., Zaunmair, P., Kreutzer, C., König, R., Marschallinger, J., Aigner, L., and Couillard-Despres, S. (2017). Tamoxifen Activation of Cre-Recombinase Has No Persisting Effects on Adult Neurogenesis or Learning and Anxiety. *Frontiers in neuroscience* *11*, 27.

- Satija, R., Farrell, J.A., Gennert, D., Schier, A.F., and Regev, A. (2015). Spatial reconstruction of single-cell gene expression data. *Nature biotechnology* *33*, 495-502.
- Saulnier, A., Keruzore, M., De Clercq, S., Bar, I., Moers, V., Magnani, D., Walcher, T., Filippis, C., Kricha, S., Parlier, D., *et al.* (2013). The doublesex homolog *Dmrt5* is required for the development of the caudomedial cerebral cortex in mammals. *Cereb Cortex* *23*, 2552-2567.
- Shin-ichi Ohnuma, a.W.A.H. (2003). Neurogenesis and the Cell Cycle.pdf. *Neuron* *40*, 199-208.
- Tury, A., Mairet-Coello, G., and DiCicco-Bloom, E. (2011). The cyclin-dependent kinase inhibitor p57Kip2 regulates cell cycle exit, differentiation, and migration of embryonic cerebral cortical precursors. *Cereb Cortex* *21*, 1840-1856.
- Visel, A., Taher, L., Girgis, H., May, D., Golonzhka, O., Hoch, R.V., McKinsey, G.L., Pattabiraman, K., Silberberg, S.N., Blow, M.J., *et al.* (2013). A high-resolution enhancer atlas of the developing telencephalon. *Cell* *152*, 895-908.
- Vogt, M.A., Chourbaji, S., Brandwein, C., Dormann, C., Sprengel, R., and Gass, P. (2008). Suitability of tamoxifen-induced mutagenesis for behavioral phenotyping. *Exp Neurol* *211*, 25-33.
- Ye, L., Allen, W.E., Thompson, K.R., Tian, Q., Hsueh, B., Ramakrishnan, C., Wang, A.C., Jennings, J.H., Adhikari, A., Halpern, C.H., *et al.* (2016). Wiring and Molecular Features of Prefrontal Ensembles Representing Distinct Experiences. *Cell* *165*, 1776-1788.
- Young, F.I., Keruzore, M., Nan, X., Gennet, N., Bellefroid, E.J., and Li, M. (2017). The doublesex-related *Dmrt2* safeguards neural progenitor maintenance involving transcriptional regulation of *Hes1*. *Proc Natl Acad Sci U S A* *114*, E5599-E5607.
- Yuki Nakamura, S.-i.S., Takaki Miyata, Masaharu Ogawa, Takuya Shimazaki, Samuel Weiss, Ryoichiro Kageyama, and Hideyuki Okano (2000). The bHLH Gene *Hes1* as a Repressor of the Neuronal Commitment of CNS Stem Cells. *The Journal of Neuroscience* *20*, 283–293.

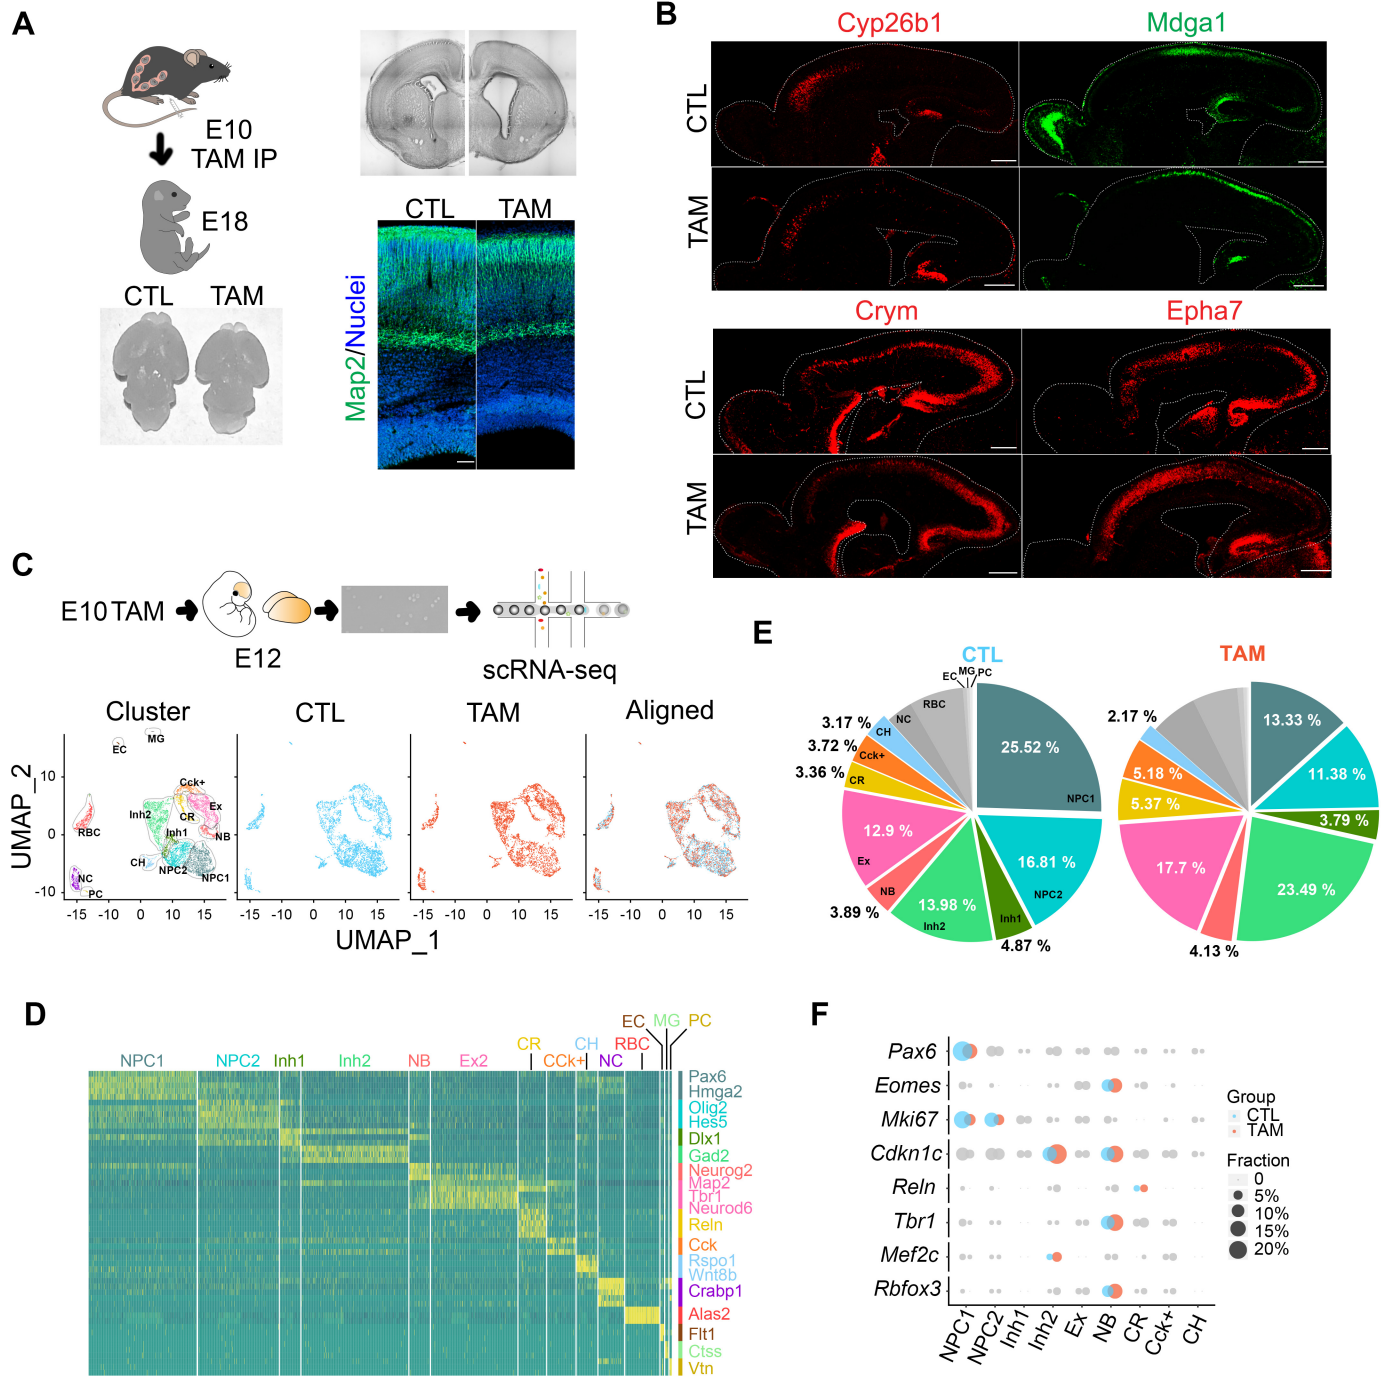

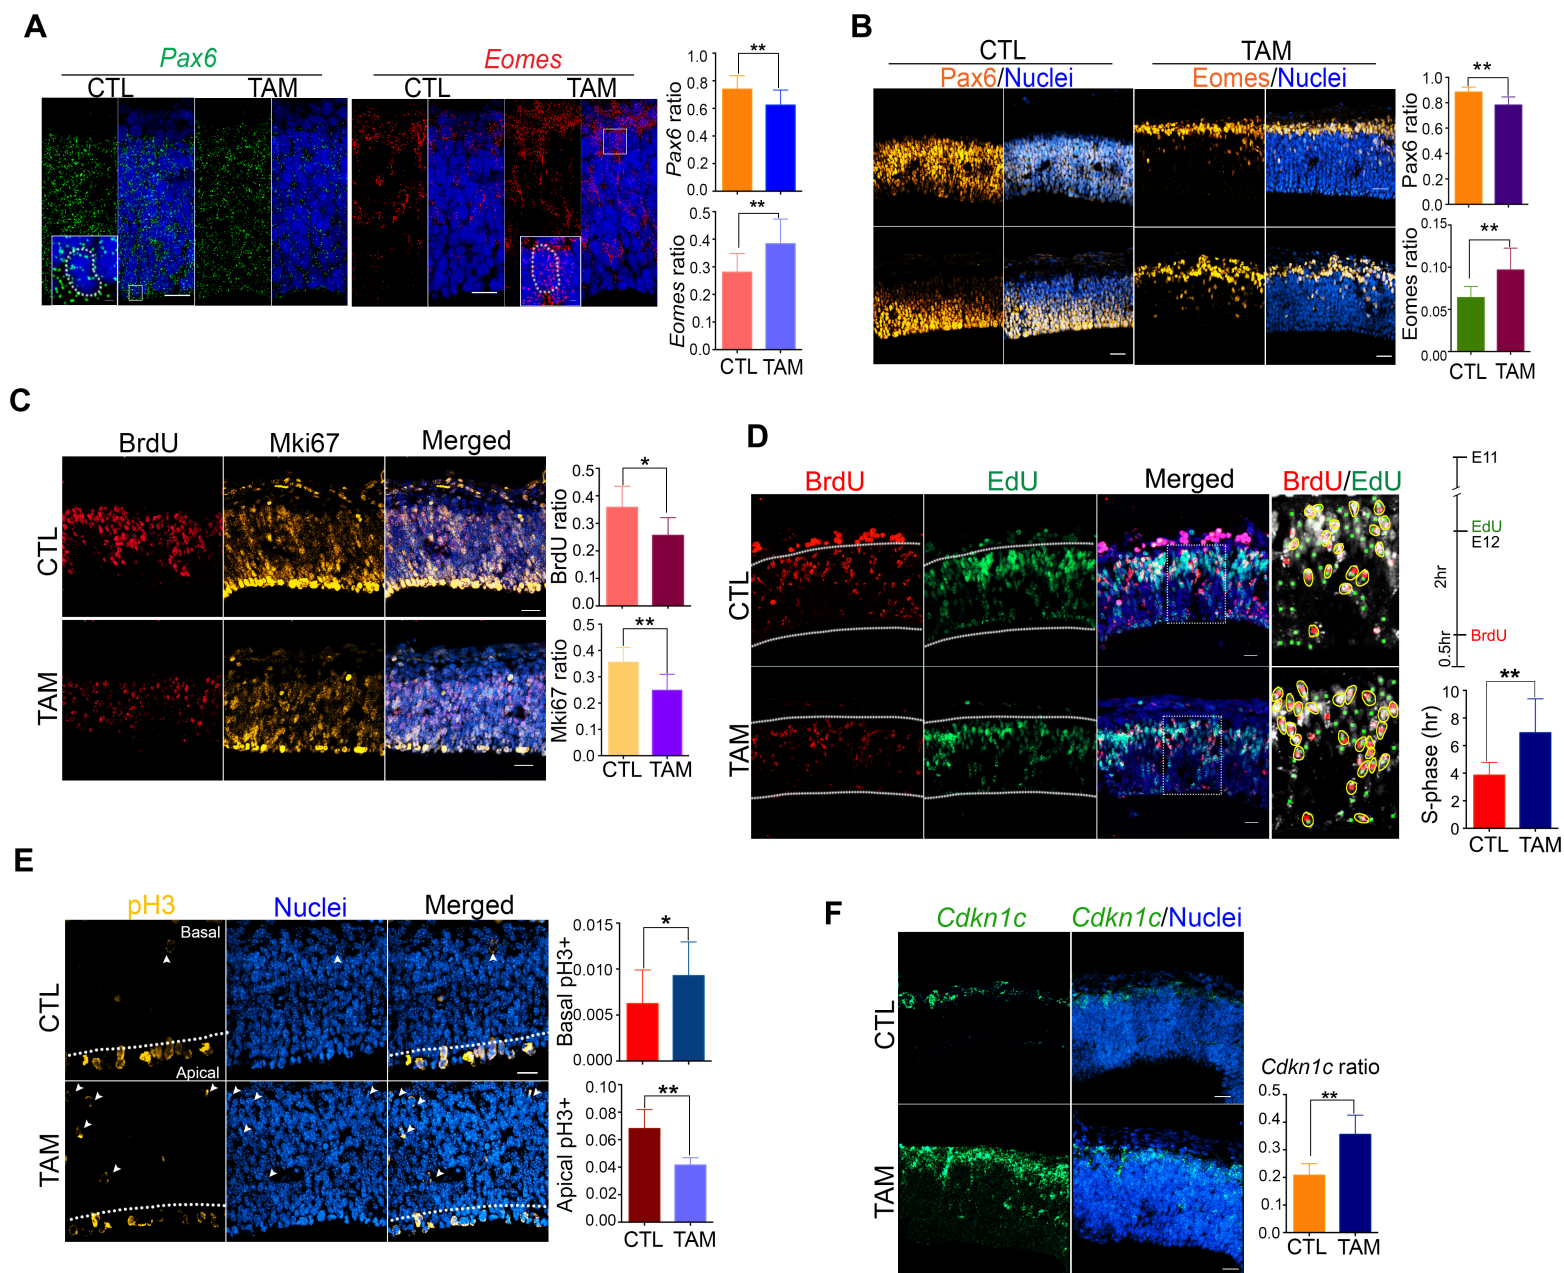

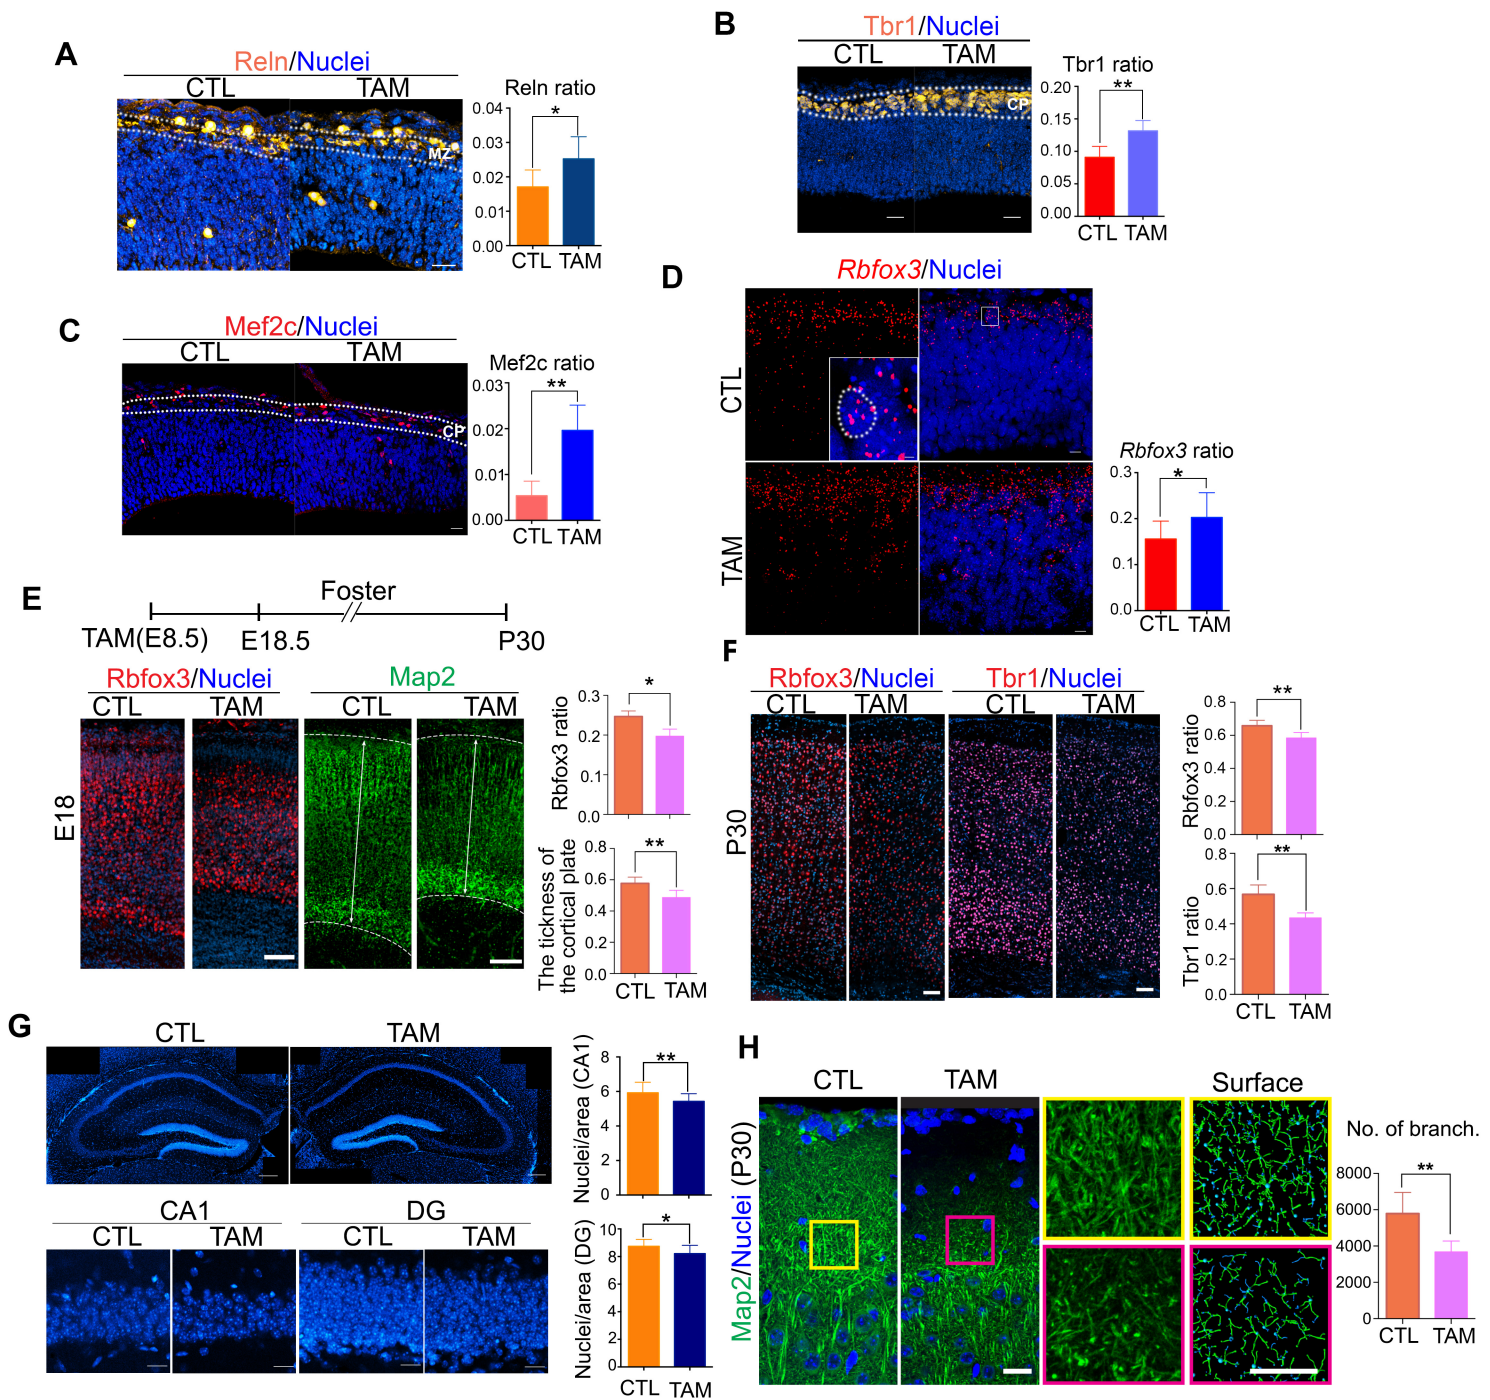



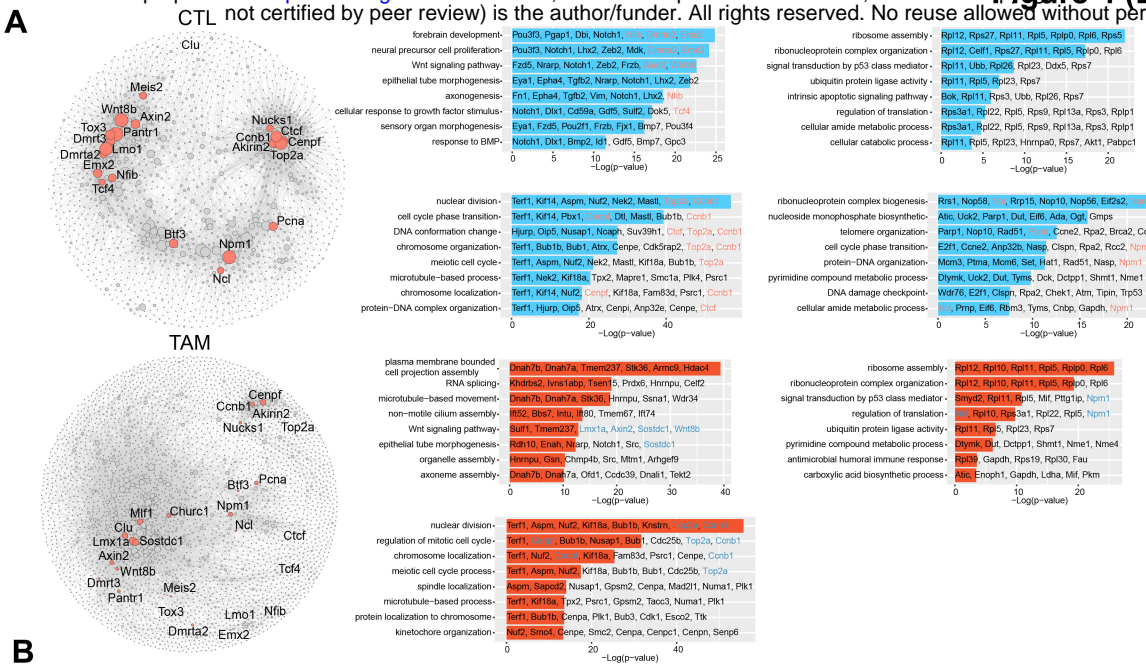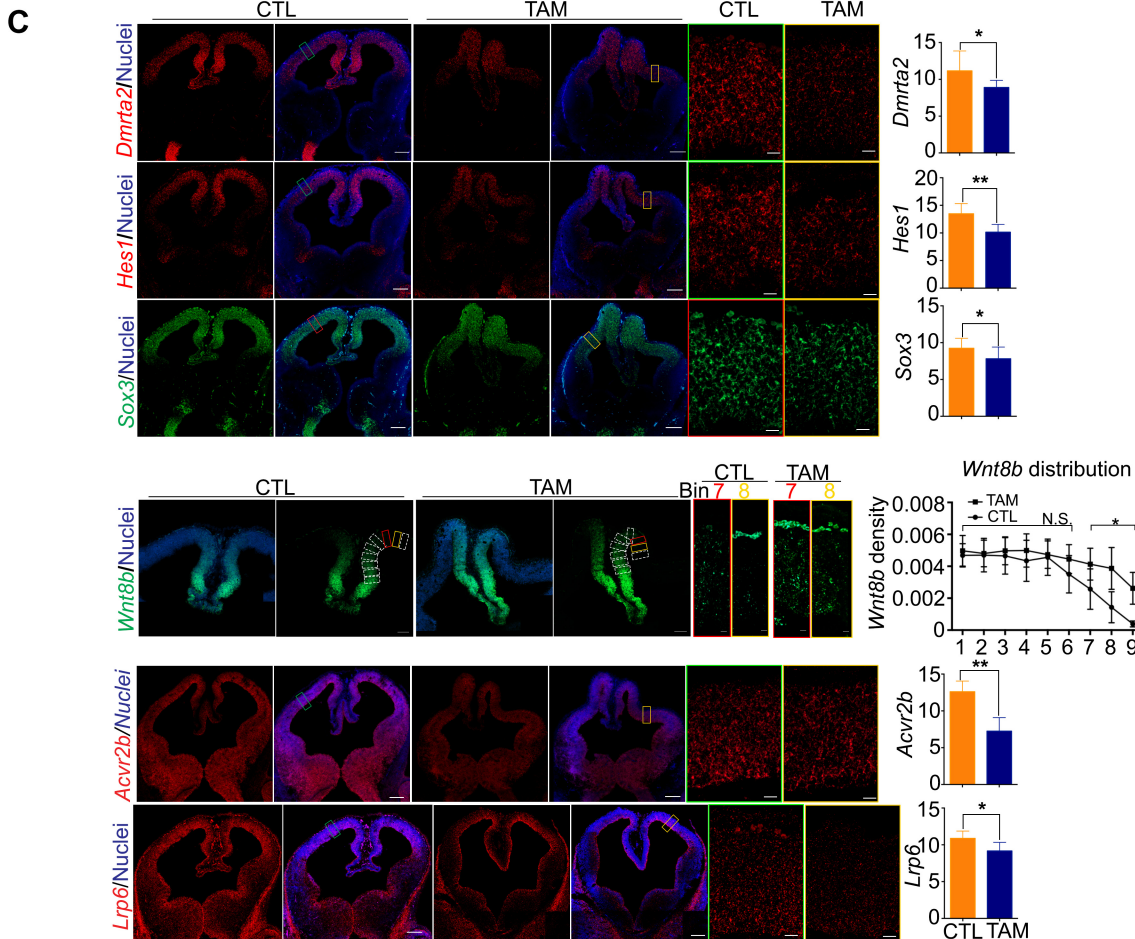

A

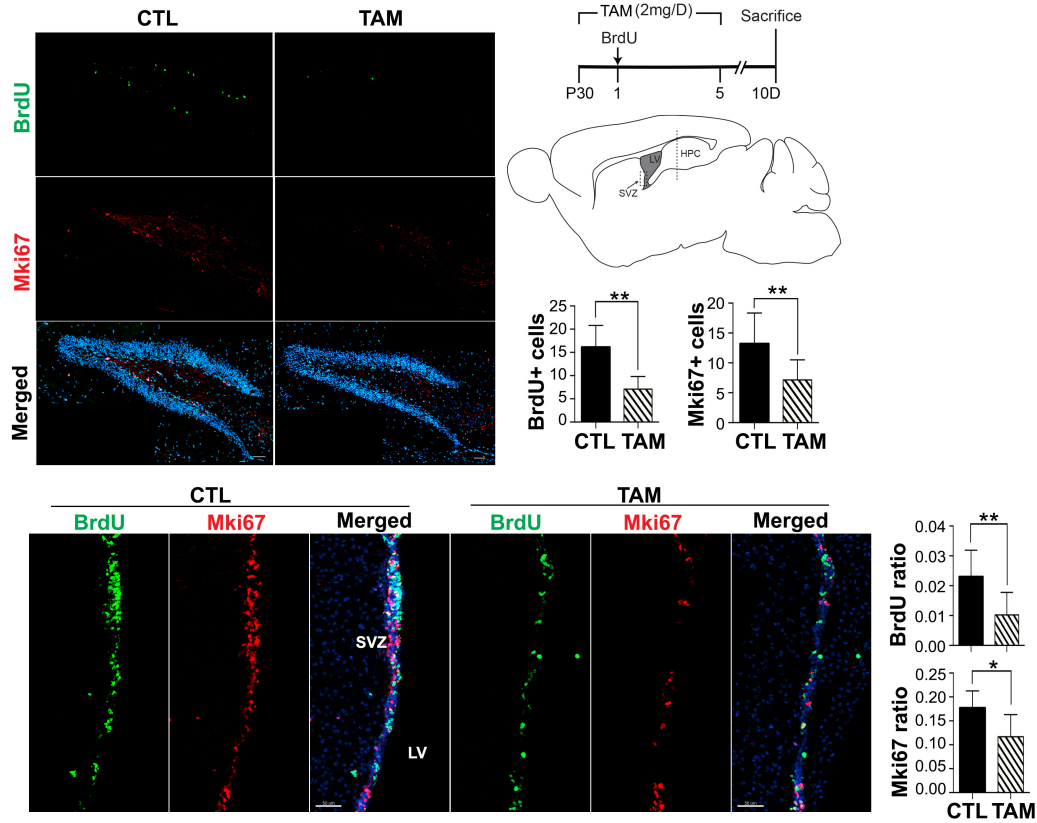

B

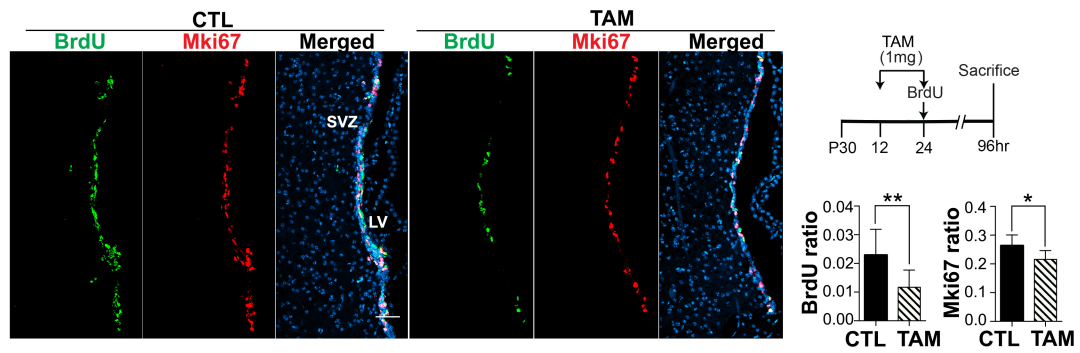

Source: https://www.biorxiv.org/content/biorxiv/early/2019/11/02/811893.full.pdf
